# Supplementary material for: Prediction of Co-Receptor Usage of HIV-1 from Genotype
Source: PubMed Central journal article supplement (PMC2855328; doi:10.1371/journal.pcbi.1000743), 2010-04-15
Supplement: pcbi.1000743.s001.pdf [file pcbi.1000743.s001.pdf]

# Prediction of Co-Receptor Usage of HIV-1 from Genotype

## – Supplementary Information –

J. Nikolaj Dybowski<sup>1,2</sup>, Dominik Heider<sup>1,2</sup> Daniel Hoffmann<sup>1,\*</sup>

**1** Department of Bioinformatics, Center for Medical Biotechnology, University of Duisburg-Essen, Essen, Germany

**2** These authors contributed equally

\* E-mail: [daniel.hoffmann@uni-due.de](mailto:daniel.hoffmann@uni-due.de)

### Contents

- Tab. 1: example of a contingency table of subtypes vs. performance.
- Fig. 1: view of V3 and electrostatics hull rotated by 90% with respect to Fig. 2 of main text.
- Fig. 2: statistics over multiple sequences originating from same patient.
- Fig. 3: ROC curves for several subtypes.

**Table 1. Contingency table for subtype dependence of performance of two-level classifier**

| Subtype | T=TP+TN | F=FP+FN |
|---------|---------|---------|
| B       | 673     | 27      |
| C       | 228     | 4       |
| D       | 117     | 9       |
| Other   | 287     | 6       |

Contingency table for a probability cutoff of 0.37 for assignment to class X4/R5X4 (this cutoff gives highest prediction accuracy  $T/(T+F)$ ).

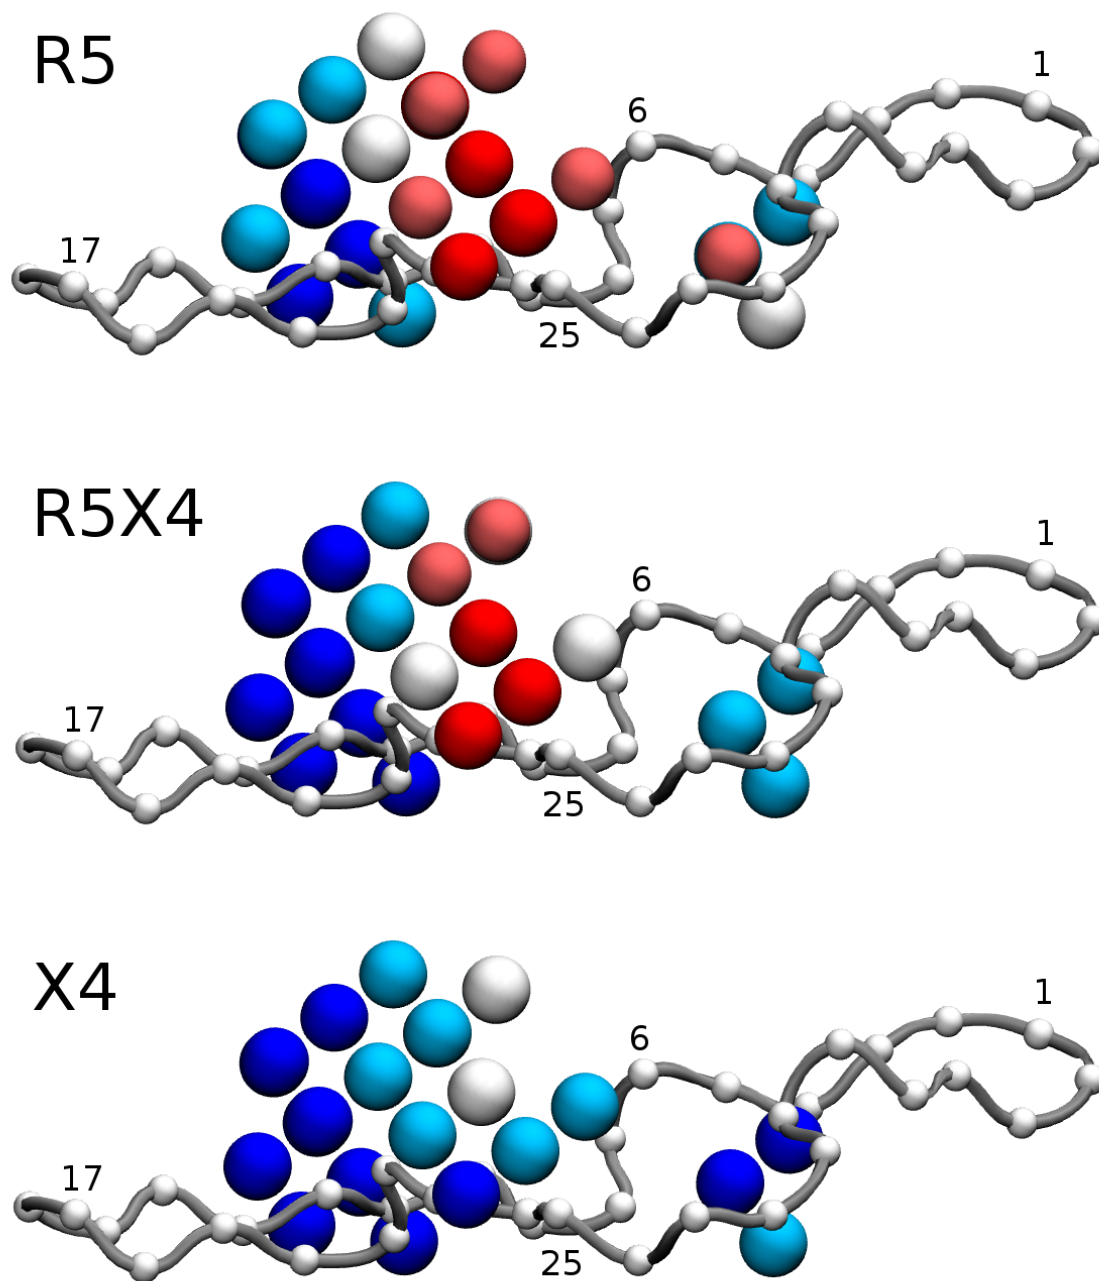

**Figure 1.** 5% most important positions on electrostatics hull for tropism classification by electrostatics based random forest. The backbone of the template V3 conformation is shown as tube with  $C_{\alpha}$  atoms marked by small beads and some residues numbered for orientation, starting with the N-terminal Cys as residue 1. Points are colored according to the mean electrostatic potential  $\langle\phi\rangle$  (unit  $k_B \cdot 300K/e$ ) in the respective tropism class (red,  $\langle\phi\rangle \leq -2.5$ ; light red,  $-2.5 < \langle\phi\rangle \leq -0.5$ ; white,  $-0.5 < \langle\phi\rangle \leq 0.5$ ; light blue,  $0.5 < \langle\phi\rangle \leq 2.5$ ; blue,  $2.5 < \langle\phi\rangle$ ). This view is rotated by  $90^\circ$  with respect to Fig. 1 of the main text.

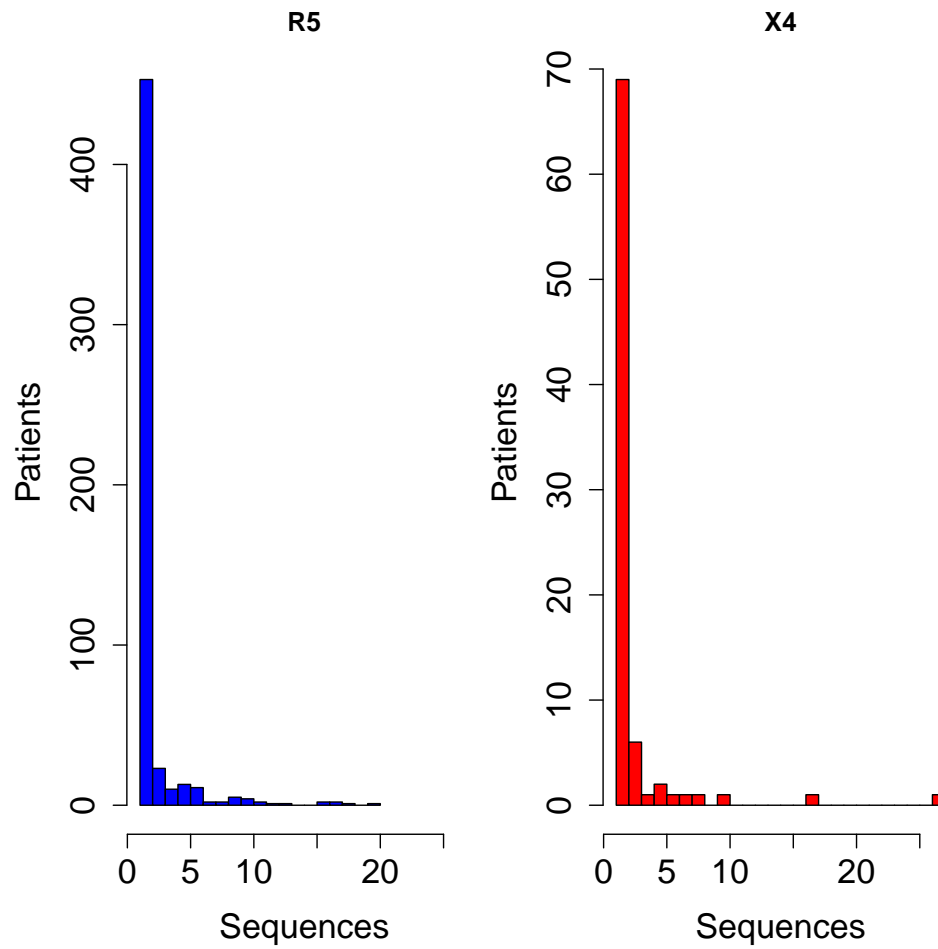

**Figure 2.** Distribution of patients with different numbers of sequences in the training and cross-validation set. Horizontal axis: number of sequences per patient in the dataset; vertical axis: patients with this number of sequences. Left plot: R5-tropic, right plot: X4-tropic.

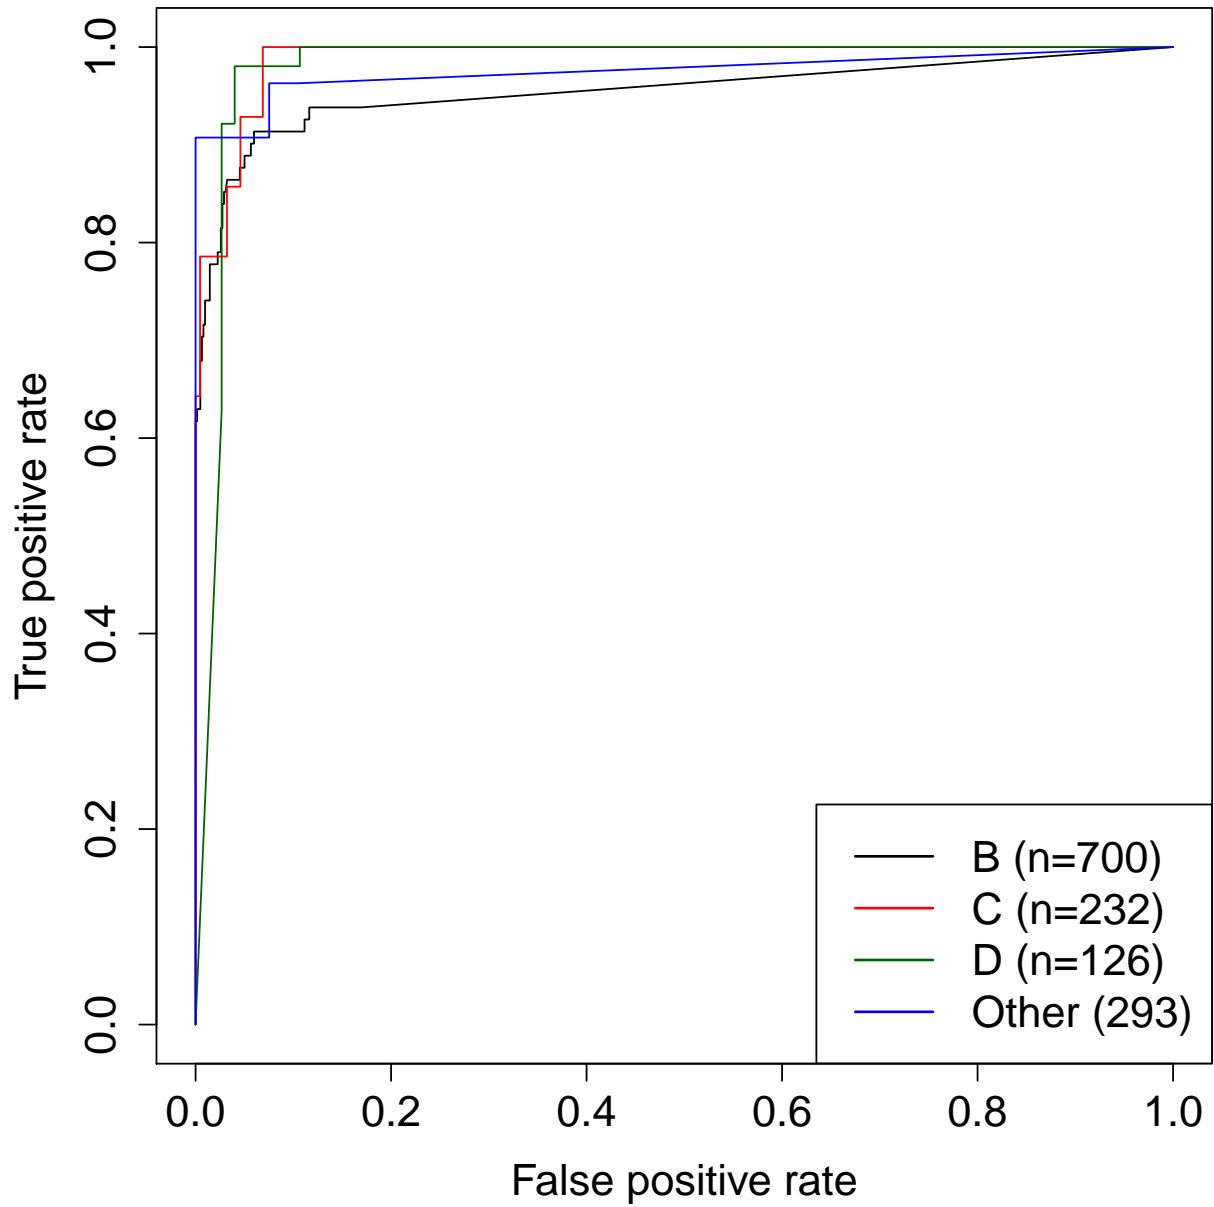

**Figure 3.** ROC curves for various subtypes in cross-validation data. Subtypes C, D, and other at most false positive rates are above subtype B. As described in the main text, predictive performance shows a significant dependency of subtype.
